# Supplementary material for: Composition regulation of nickel selenide and its effects on the catalytic activity in the oxygen reduction reaction
Source: Royal Society of Chemistry journal article supplement (doi:10.1039/d3nj01774e), 2023-01-01
Supplement: d3nj01774e1.pdf [file d3nj01774e1.pdf]

## Composition regulation of nickel selenide and its effects on the catalytic activity of oxygen reduction reaction

Huachen Zhang,<sup>a</sup> Shengbiao Zheng,<sup>\*a,b</sup> Jing Tang,<sup>a,b</sup> Rui Chen,<sup>a</sup> Jingjing Yang,<sup>a</sup> Wenjing Tong,<sup>a</sup> Jiahao Guo<sup>\*a,b</sup>

a. College of Chemistry and Materials Engineering, Anhui Science and Technology University, Bengbu, Anhui, 233100, China.

b. Anhui Province Quartz Sand Purification and Photovoltaic Glass Engineering Research Center, Bengbu, Anhui, 233100, China.

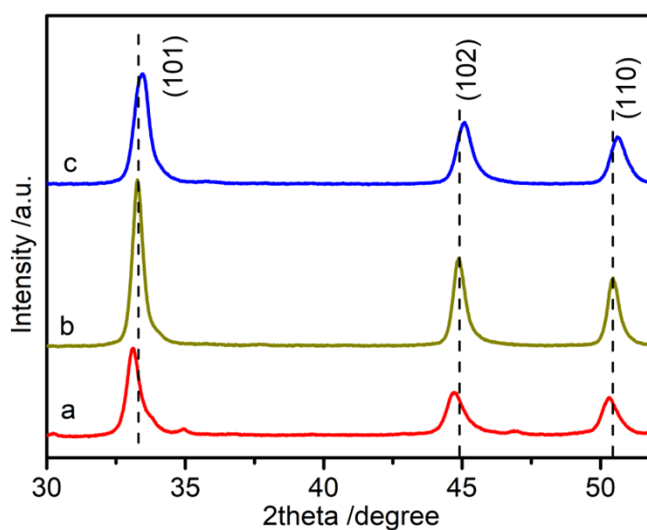

Figure S1 XRD pattern comparison of three  $\text{Ni}_{1-x}\text{Se}$  ( $x=0-0.15$ ).

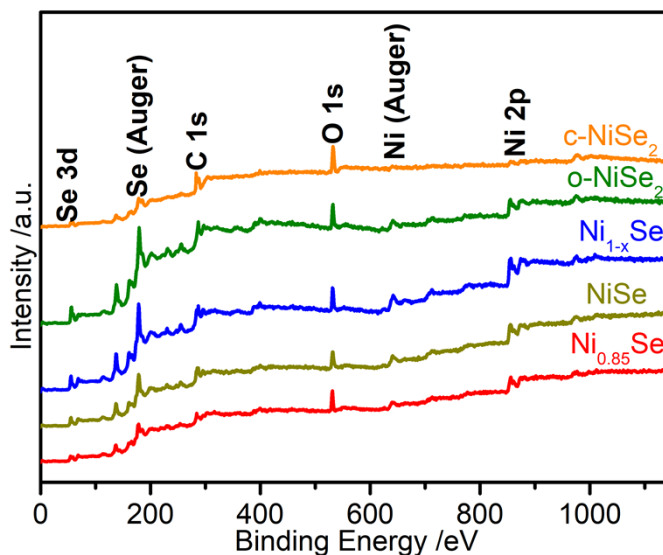

Figure S2 XPS survey spectrum of five nickel selenides.

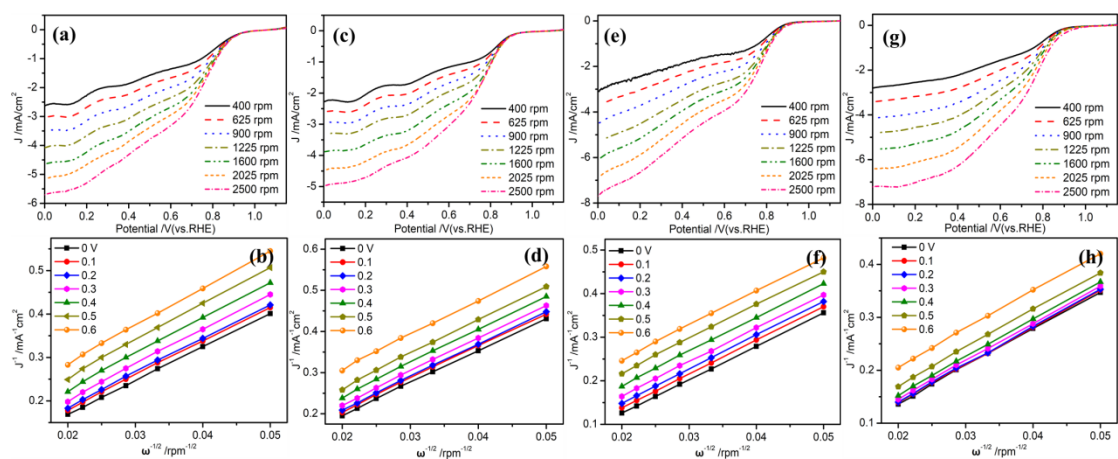

**Figure S3** LSV and calculated K-L plots of (a, b)  $\text{Ni}_{0.85}\text{Se}$ , (c, d)  $\text{NiSe}$ , (e, f)  $\text{o-NiSe}_2$ , (g, h)  $\text{c-NiSe}_2$ .

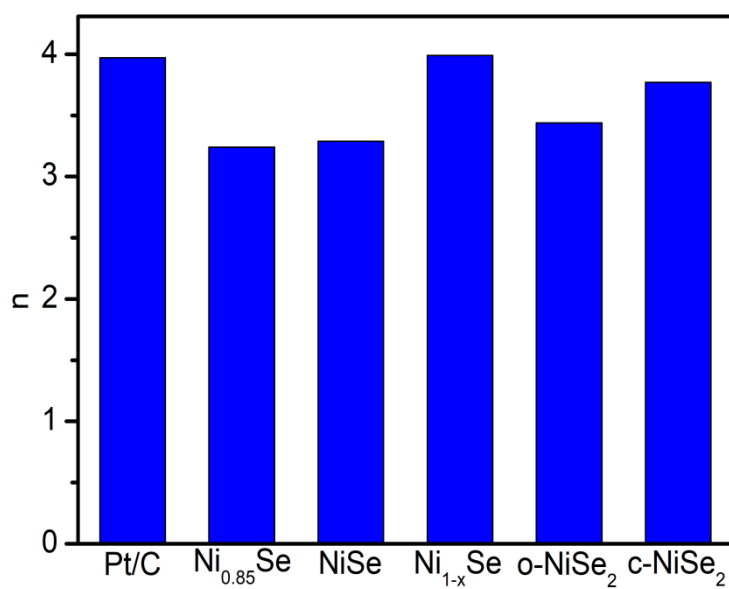

**Figure S4** Transferred electron number  $n$  of ORR for five nickel selenides and Pt/C at 0.4 V calculated from Figure 5c.
